# Supplementary material for: Ameliorative Effects of Lactobacillus plantarum HAC01 Lysate on 3T3-L1 Adipocyte Differentiation via AMPK Activation and MAPK Inhibition
Source: MDPI journal article supplement (doi:10.3390/ijms23115901), 2022-05-24
Supplement: s1 [file s1]

**Table S1.** Antibodies for western blotting.

| <b>Antibody</b> | <b>Dilution</b> | <b>Supplier</b>           | <b>Catalog No.</b> |
|-----------------|-----------------|---------------------------|--------------------|
| p-ACC           | 1:1000          | Abcam                     | ab68191            |
| ACC             | 1:1000          | Cell Signaling Technology | #3662              |
| FAS             | 1:1000          | Santa Cruz Biotechnology  | sc-48357           |
| C/EBP $\beta$   | 1:1000          | Cell Signaling Technology | #3087              |
| C/EBP $\alpha$  | 1:1000          | Cell Signaling Technology | #8178              |
| PPAR $\gamma$   | 1:1000          | Cell Signaling Technology | #2443              |
| SREBP-1c        | 1:500           | Santa Cruz Biotechnology  | sc-13551           |
| p-AMPK          | 1:1000          | Cell Signaling Technology | #2535              |
| AMPK            | 1:1000          | Cell Signaling Technology | #2532              |
| p-ERK           | 1:1000          | Cell Signaling Technology | #4370              |
| ERK             | 1:1000          | Cell Signaling Technology | #4695              |
| p-p38           | 1:1000          | Cell Signaling Technology | #4511              |
| P38             | 1:1000          | Cell Signaling Technology | #8690              |
| p-JNK           | 1:1000          | Cell Signaling Technology | #4668              |
| JNK             | 1:1000          | Cell Signaling Technology | #9252              |
| $\beta$ -actin  | 1:1000          | Abcam                     | ab6276             |

ACC, acetyl-CoA carboxylase; FAS, fatty acid synthase; C/EBP, CCAAT/enhancer-binding protein; PPAR $\gamma$ , peroxisome proliferator-activated receptor gamma; SREBP-1c, sterol regulatory element-binding protein 1c; AMPK, adenosine monophosphate-activated protein kinase; ERK, extracellular regulated kinase; JNK, c-Jun -N-terminal kinase.

**Table S2.** Primer sequences used for qRT-PCR.

| <b>Gene</b>                     | <b>Forward (5'-3')</b> | <b>Reverse (5'-3')</b> |
|---------------------------------|------------------------|------------------------|
| <i>Acc</i>                      | GCGTCGGGTAGATCCAGTT    | CTCAGTGGGGCTTAGCTCTG   |
| <i>Fas</i>                      | TTGCTGGCACTACAGAATGC   | AACAGCCTCAGAGCGACAAT   |
| <i>Lpl</i>                      | TCCAAGGAAGCCTTTGAGAA   | CCATCCTCAGTCCCAGAAAA   |
| <i>aP2</i>                      | TCACCTGGAAGACAGCTCCT   | AATCCCCATTTACGCTGATG   |
| <i>C/ebpa</i>                   | TTACAACAGGCCAGGTTTCC   | GGCTGGCGACATACAGTACA   |
| <i>Ppar<math>\gamma</math></i>  | TTTTCAAGGGTGCCAGTTT    | AATCCTTGGCCCTCTGAGAT   |
| <i>Srebp-1c</i>                 | TGTTGGCATCCTGCTATCTG   | AGGGAAAGCTTTGGGGTCTA   |
| <i><math>\beta</math>-actin</i> | CCACAGCTGAGAGGAAATC    | AAGGAAGGCTGGAAAAGAGC   |

*Acc*, acetyl-CoA carboxylase; *Fas*, fatty acid synthase; *Lpl*, lipoprotein lipase; *aP2*, adipocyte Protein 2; *C/EBP $\alpha$* , CCAAT/enhancer-binding protein alpha; *PPAR $\gamma$* , peroxisome proliferator-activated receptor gamma; *SREBP-1c*, sterol regulatory element-binding protein 1c.
